# Supplementary material for: When Suddenly Nothing Works Anymore Within a Team – Causes of Collective Sport Team Collapse
Source: PubMed Central journal article supplement (PMC6232390; doi:10.3389/fpsyg.2018.02115), 2018-11-06
Supplement: Data_Sheet_1.pdf [file Data_Sheet_1.pdf]

## **Interview Guide**

**Short colloquial description of team collapse read out to the participant:** “A collective team collapse is the moment or process, when the performance of your team unexpectedly decreases more than normal. It is the situation, when your team experiences a significant performance collapse during a competition / game. It is the moment or process when ‘nothing works anymore’ within your team during a specific competition / game.”

**0.** Describe a team collapse that happened during the last 12 months while you were playing.

*(If a person cannot recall a team collapse within the last 12 months: Describe a team collapse that happened during the last 5 years while you were playing.)*

### **Questions about the Team Collapse**

- 1.** What kind of game/competition was it?
- 2.** At what point within the game did the team collapse occur?
- 3.** How long did the collapse last?
- 4.** How many players were involved?
- 5.** What role within the team did the involved players fulfill?
- 6.** What happened within the team during the team collapse?
- 7.** Describe the atmosphere within the team during the course of play.

### **Impact of Team Collapse on Players and Game**

- 8.** What happened within the team during the team collapse?
- 9.** Describe the atmosphere within the team during the course of play.
- 10.** To what extent did the team collapse influence the further course of play?
- 11.** To what extent did the team collapse influence the next training / game?
- 12.** How do you react to team collapse instantly and after the game?

### **Influencing Factors of Team Collapse**

- 13.** In your opinion, what were the influencing factors for the team collapse?
- 14.** Is there anything else you would like to mention regarding the topic of team collapse?
